# Supplementary material for: Inactivation of TRPM7 kinase activity does not impair its channel function in mice
Source: PubMed Central journal article supplement — Sci Rep. 2014 Jul 17;4:5718. doi: 10.1038/srep05718 (PMC4101474; doi:10.1038/srep05718), 2014-07-17

## **Supplementary information**

### **Inactivation of TRPM7 kinase activity does not impair its channel function in mice**

Taku Kaitsuka, Chiaki Katagiri, Pavani Beesetty, Kenji Nakamura  
Siham Hourani, Kazuhito Tomizawa, J. Ashot Kozak, and Masayuki Matsushita

Supplementary Figure S1. Full-length gel images of Figure 1B.

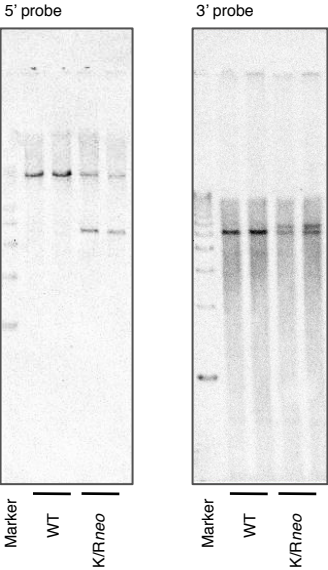

Supplementary Figure S2. Full-length gel images of Figure 1C.

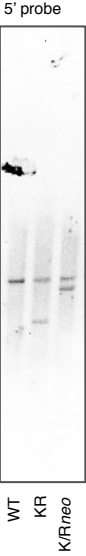

Supplementary Figure S3. Full-length gel images of Figure 1D.

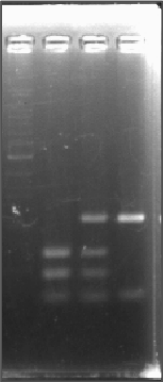

Marker

WT

K/R

R/R

Supplementary Figure S4. Full-length gel images of Figure 3.

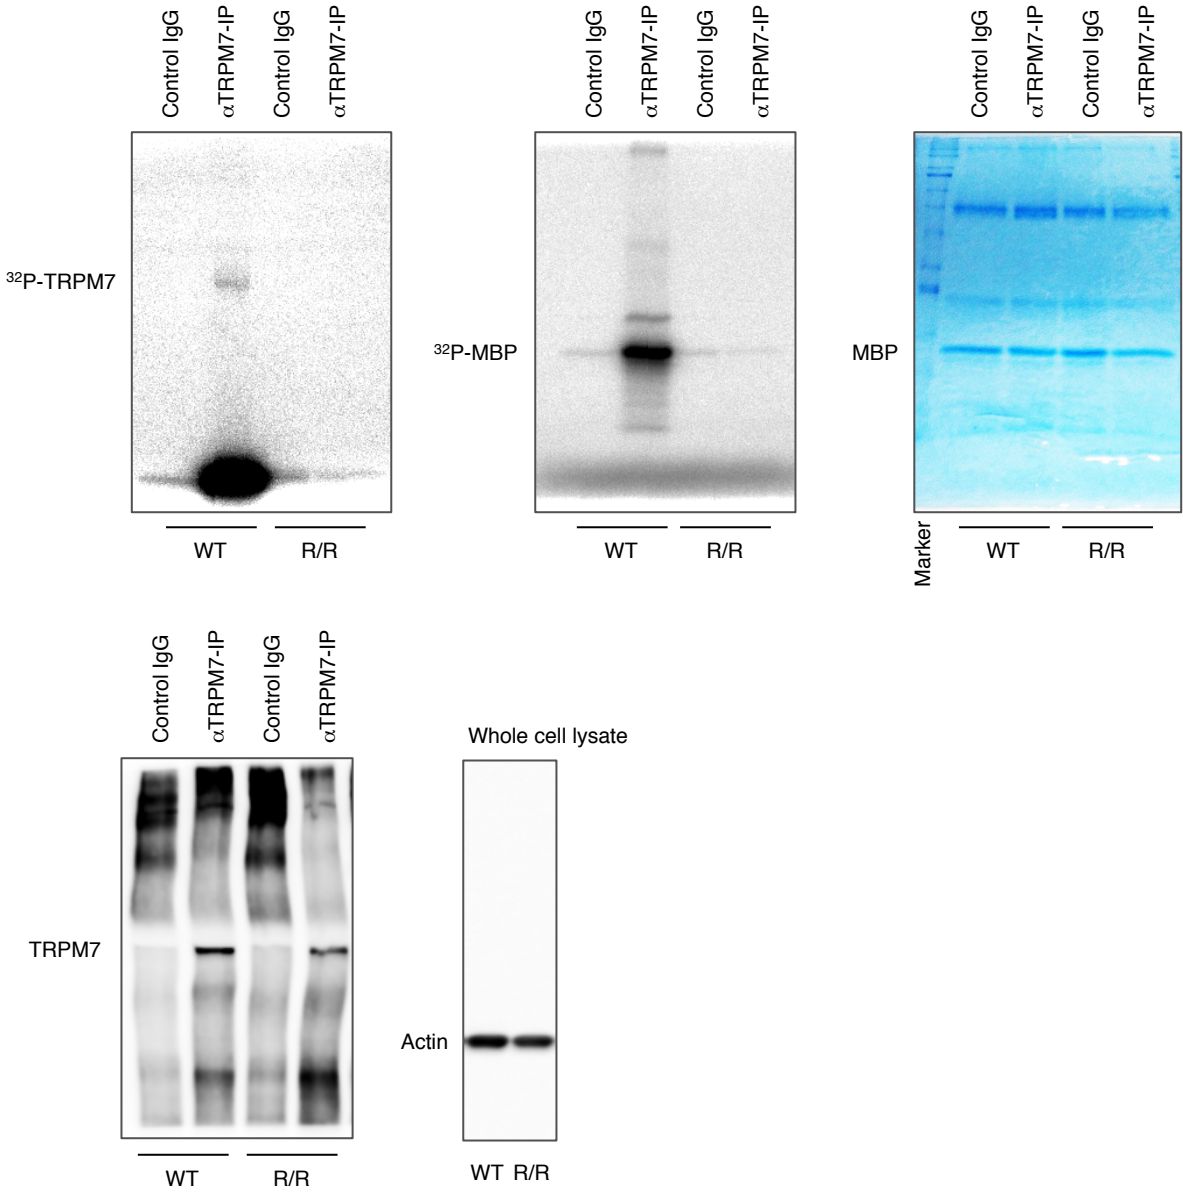

Supplementary Figure S5. Full-length gel images of Figure 4A.

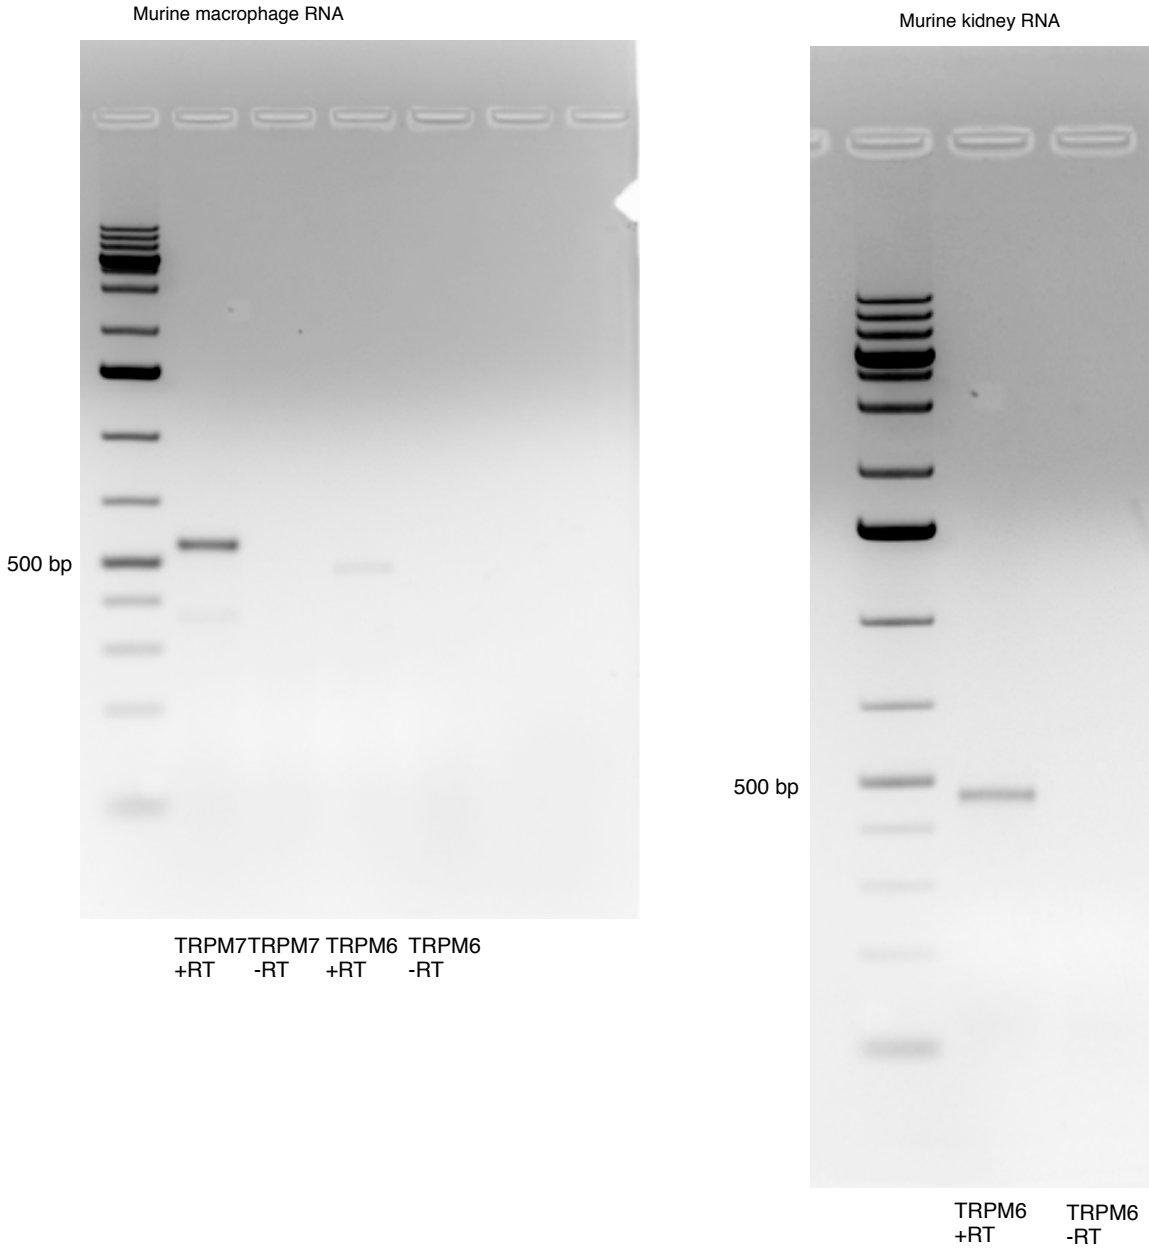

Supplementary Figure S6. Full-length gel images of Figure 4B.

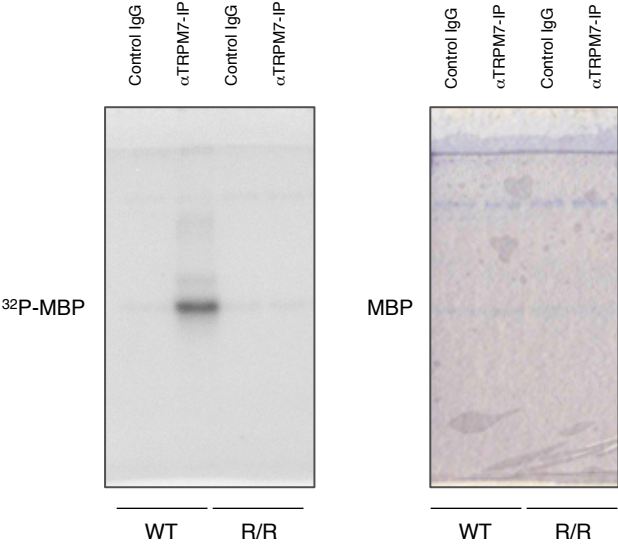

Supplementary Figure S7. Full-length gel images of Figure 4C.

A

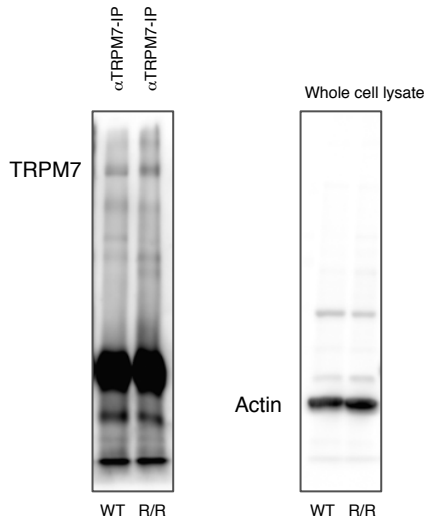

B

Time course of TRPM7 current development with internal spermine (300  $\mu$ M) and no  $Mg^{2+}$ .

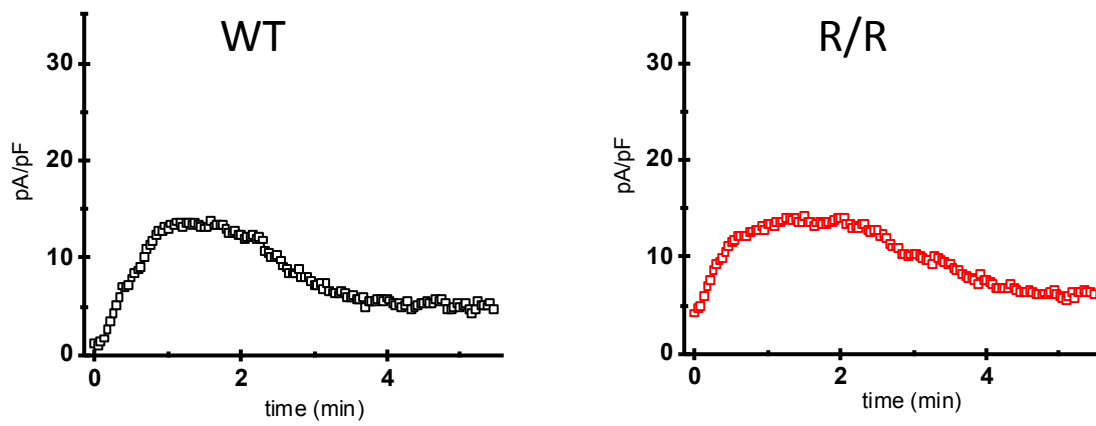

Supplement: srep05718-s1.pdf [file srep05718-s1.pdf]
